# Supplementary material for: Statistical evaluation of photon count rate data for nanoscale particle measurement in wastewaters
Source: Royal Society of Chemistry journal article supplement (doi:10.1039/c1em10237k), 2011-11-03

## SUPPORTING INFORMATION

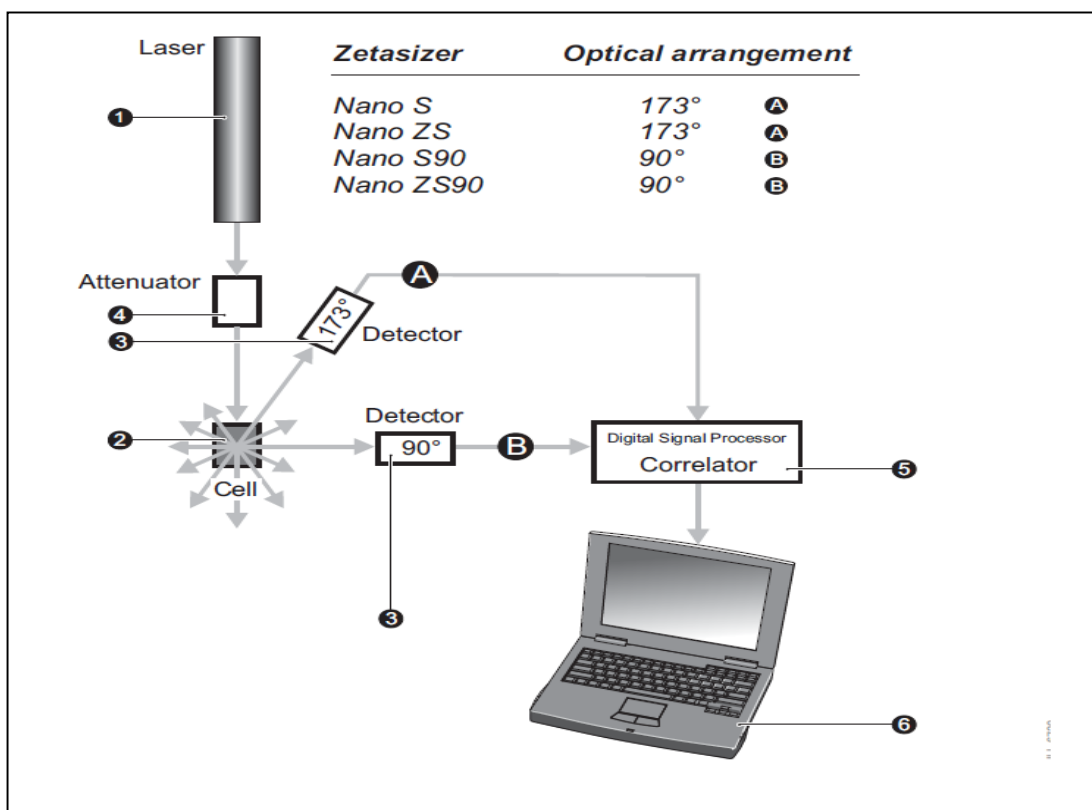

**Figure SI 1.** Sketch of Zetasizer set up. (Malvern Instruments (2004). Zetasizer Nano Series User Manual. MAN0317, Issue 2.1.

<http://www.nbtc.cornell.edu/facilities/downloads/Zetasizer%20Manual.pdf>. Accessed on 12-6-2010)

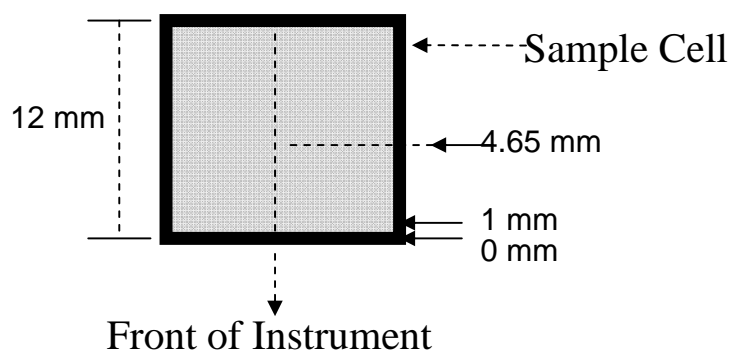

**Figure SI 2.** Schematic indicating the measurement position in the sample cell. A lower number indicates a position closer to the cell wall and a higher number indicates a position closer to the center of the sample cell. (Malvern Instruments (2004). Zetasizer Nano Series User Manual. MAN0317, Issue 2.1. <http://www.nbtc.cornell.edu/facilities/downloads/Zetasizer%20Manual.pdf>. Accessed on 12-6-2010)

**Table SI 1.** Percent of laser power (4.0 mW) used at various attenuator indices by Zetasizer.

| Attenuator Index | Transmission (% Nominal) |
|------------------|--------------------------|
| 0                | 0                        |
| 1                | 0.0003                   |
| 2                | 0.003                    |
| 3                | 0.01                     |
| 4                | 0.03                     |
| 5                | 0.1                      |
| 6                | 0.3                      |
| 7                | 1                        |
| 8                | 3                        |
| 9                | 10                       |
| 10               | 30                       |
| 11               | 100                      |

## I. Oneway ANOVA Test Data

### Oneway for Factor = Day

#### ANOVA

kCPS

| SampleID |                | Sum of Squares | df | Mean Square | F      | Sig. |
|----------|----------------|----------------|----|-------------|--------|------|
| .10      | Between Groups | 2.707          | 1  | 2.707       | .271   | .614 |
|          | Within Groups  | 100.022        | 10 | 10.002      |        |      |
|          | Total          | 102.729        | 11 |             |        |      |
| .25      | Between Groups | 1.763          | 1  | 1.763       | .481   | .504 |
|          | Within Groups  | 36.623         | 10 | 3.662       |        |      |
|          | Total          | 38.387         | 11 |             |        |      |
| .50      | Between Groups | 5.741          | 1  | 5.741       | .479   | .504 |
|          | Within Groups  | 119.742        | 10 | 11.974      |        |      |
|          | Total          | 125.482        | 11 |             |        |      |
| .75      | Between Groups | 39.241         | 1  | 39.241      | 4.796  | .053 |
|          | Within Groups  | 81.828         | 10 | 8.183       |        |      |
|          | Total          | 121.069        | 11 |             |        |      |
| 1.00     | Between Groups | 104.430        | 1  | 104.430     | 20.734 | .001 |
|          | Within Groups  | 50.367         | 10 | 5.037       |        |      |
|          | Total          | 154.797        | 11 |             |        |      |

### Oneway for Factor = Analyst

#### ANOVA

kCPS

| SampleID |                | Sum of Squares | df | Mean Square | F     | Sig. |
|----------|----------------|----------------|----|-------------|-------|------|
| .10      | Between Groups | 40.701         | 1  | 40.701      | 6.562 | .028 |
|          | Within Groups  | 62.028         | 10 | 6.203       |       |      |
|          | Total          | 102.729        | 11 |             |       |      |
| .25      | Between Groups | .563           | 1  | .563        | .149  | .708 |
|          | Within Groups  | 37.823         | 10 | 3.782       |       |      |
|          | Total          | 38.387         | 11 |             |       |      |
| .50      | Between Groups | 2.707          | 1  | 2.707       | .221  | .649 |
|          | Within Groups  | 122.775        | 10 | 12.277      |       |      |
|          | Total          | 125.482        | 11 |             |       |      |
| .75      | Between Groups | .041           | 1  | .041        | .003  | .955 |
|          | Within Groups  | 121.028        | 10 | 12.103      |       |      |
|          | Total          | 121.069        | 11 |             |       |      |
| 1.00     | Between Groups | 5.070          | 1  | 5.070       | .339  | .574 |
|          | Within Groups  | 149.727        | 10 | 14.973      |       |      |
|          | Total          | 154.797        | 11 |             |       |      |

## II. Photon Count Rates (kCPS) for Filtered Wastewater Effluents after 2.5 and 5 minutes of Equilibration Time during Preliminary Screening Studies

| % Wastewater in the Sample | 2.5 Minute Equilibration |                 | 5 Minute Equilibration   |                |
|----------------------------|--------------------------|-----------------|--------------------------|----------------|
|                            | Photon Count Rate (kCPS) | Sample Quality* | Photon Count Rate (kCPS) | Sample Quality |
| 100 % (No Dilution)        | 83.7                     | Good            | 87.7                     | Poor           |
| 50 %                       | 48.5                     | Poor            | 49.7                     | Good           |
| 25 %                       | 32.3                     | Poor            | 32.3                     | Good           |
| 12.5 %                     | 29.5                     | Poor            | 27.3                     | Poor           |
| 10 %                       | 27                       | Poor            | 28                       | Good           |

\* - Based on Zetasizer Internal QA Criteria

## III. Summary of Particle Size Distribution and QA Data during Detailed DLS Analyses of Filtered Wastewater Effluent from OCSD

| Parameter                  | Range          | Average | Median | QA Criteria | Result                       |
|----------------------------|----------------|---------|--------|-------------|------------------------------|
| Polydispersity Index (PdI) | 0.168 to 0.758 | 0.297   | 0.272  | < 1         | Met the QA Criteria          |
| Correlation Intercept      | 0.282 to 0.752 | 0.57    | 0.617  | 0.1 to 0.9  | Met the QA Criteria          |
| In-range Value (%)         | 68.2 to 95.7   | 86.9    | 88.3   | > 90%       | Did Not Meet the QA Criteria |
| Intensity Mean (d. nm)     | 63.8 to 812    | 245     | 163    | NA          | NA                           |
| Volume Mean (d. nm)        | 30.5 to 832    | 168     | 88     | NA          | NA                           |
| Number Mean (d. nm)        | 16.6 to 85     | 43      | 42     | NA          | NA                           |

NA – Not Applicable

#### IV. Nanoscale Particle Size Distribution for filtered OCSD effluent, nano silica stock suspension, and the spike sample containing both in 1:1 (v:v) dilution.

The wastewater contained a significantly lower number of particles (40 kCPS) and at lower average particle size (~ 50 nm). The silica suspension contained larger number of particles (~ 564) and larger size particles (aggregated size of approximately 200 nm). Upon mixing the same in equal volume the resulting sample had a particle size distribution similar to that of the nanosilica suspension.

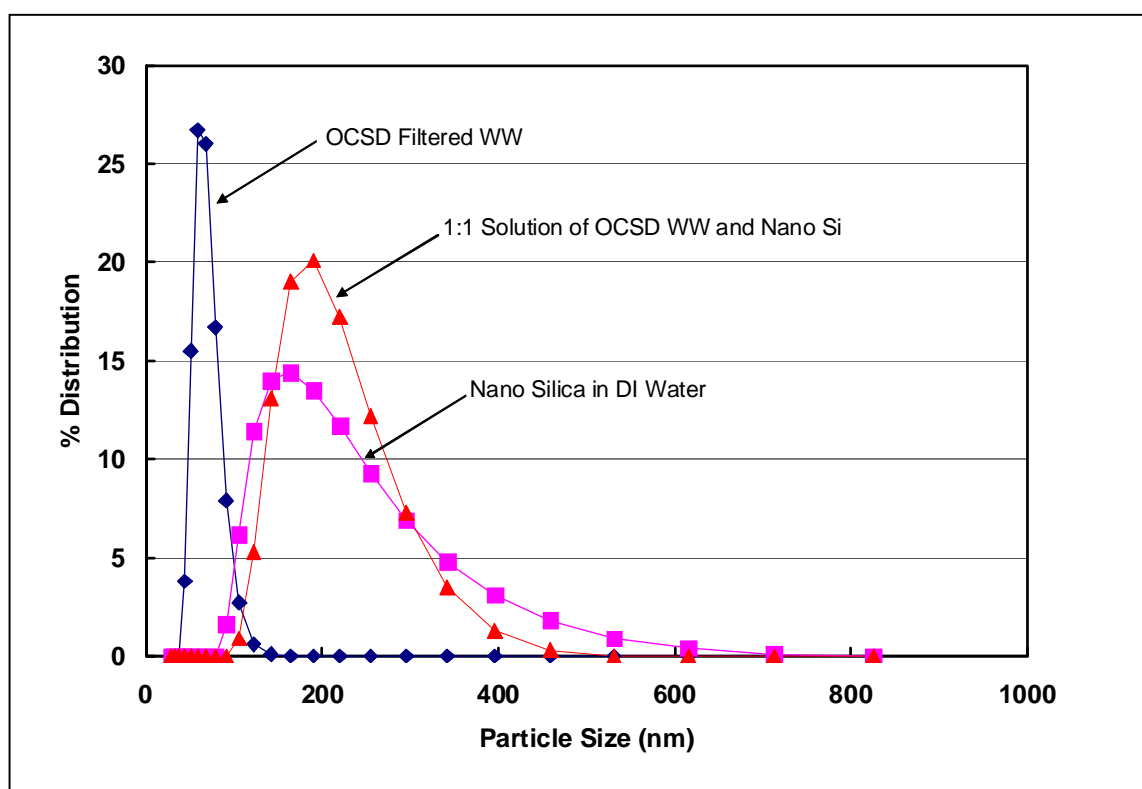

Supplement: c1em10237k.pdf [file c1em10237k.pdf]
